# Supplementary material for: Environmental determinants of the occurrence and activity of Ixodes ricinus ticks and the prevalence of tick-borne diseases in eastern Poland
Source: PubMed Central journal article supplement (PMC8322139; doi:10.1038/s41598-021-95079-3), 2021-07-29
Supplement: 41598_2021_95079_MOESM1_ESM.pdf [file 41598_2021_95079_MOESM1_ESM.pdf]

| District   | Month       |      |         |      |      |         |      |      |         |      |      |         |      |      |         |      |      |         |      |      |         |      |      |         |
|------------|-------------|------|---------|------|------|---------|------|------|---------|------|------|---------|------|------|---------|------|------|---------|------|------|---------|------|------|---------|
|            | III         |      |         | IV   |      |         | V    |      |         | VI   |      |         | VII  |      |         | VIII |      |         | IX   |      |         | X    |      |         |
|            | T           | RH   | StDf    | T    | RH   | StDf    | T    | RH   | StDf    | T    | RH   | StDf    | T    | RH   | StDf    | T    | RH   | StDf    | T    | RH   | StDf    | T    | RH   | StDf    |
|            | [°C]        | [%]  | [mm Hg] | [°C] | [%]  | [mm Hg] | [°C] | [%]  | [mm Hg] | [°C] | [%]  | [mm Hg] | [°C] | [%]  | [mm Hg] | [°C] | [%]  | [mm Hg] | [°C] | [%]  | [mm Hg] | [°C] | [%]  | [mm Hg] |
|            | Subregion A |      |         |      |      |         |      |      |         |      |      |         |      |      |         |      |      |         |      |      |         |      |      |         |
| Puławy     | 9.9         | 77.0 | 3.78    | 19.0 | 85.5 | 16.25   | 17.0 | 70.0 | 17.19   | 19.0 | 63.7 | 28.84   | 24.2 | 60.1 | 76.27   | 24.9 | 55.5 | 117.98  | 13.8 | 60.6 | 17.22   | 13.0 | 71.0 | 7.68    |
| Opole      | 13.0        | 72.5 | 7.41    | 17.7 | 73.3 | 18.72   | 17.6 | 69.0 | 19.80   | 18.7 | 55.1 | 28.16   | 22.9 | 59.0 | 50.98   | 25.1 | 50.8 | 119.34  | 15.8 | 66.7 | 14.18   | 12.5 | 75.4 | 6.24    |
| Ryki       | 8.0         | 88.2 | 1.55    | 16.8 | 72.1 | 15.76   | 14.9 | 77.0 | 9.38    | 20.5 | 55.6 | 41.44   | 23.6 | 50.9 | 49.82   | 24.8 | 45.0 | 102.01  | 16.0 | 53.7 | 16.53   | 12.2 | 80.9 | 4.83    |
| Kraśnik    | 9.7         | 80.5 | 3.18    | 12.9 | 72.8 | 7.19    | 17.0 | 72.3 | 16.43   | 21.6 | 67.1 | 50.57   | 25.0 | 54.2 | 82.07   | 26.8 | 47.7 | 176.13  | 15.0 | 59.0 | 13.36   | 13.0 | 77.7 | 6.34    |
|            | Subregion B |      |         |      |      |         |      |      |         |      |      |         |      |      |         |      |      |         |      |      |         |      |      |         |
| Radzyń     | 7.5         | 70.0 | 3.27    | 17.0 | 80.2 | 13.13   | 18.5 | 71.0 | 23.28   | 21.0 | 68.2 | 43.31   | 25.0 | 44.9 | 61.18   | 23.0 | 58.7 | 74.38   | 15.5 | 63.6 | 13.93   | 11.5 | 77.7 | 4.82    |
| Lublin     | 11.0        | 81.0 | 3.89    | 15.1 | 77.7 | 9.54    | 17.3 | 72.0 | 17.60   | 22.3 | 54.9 | 62.45   | 26.1 | 47.7 | 91.83   | 27.0 | 51.4 | 194.34  | 14.3 | 63.0 | 11.17   | 14.0 | 69.3 | 9.59    |
| Lubartów   | 12.3        | 81.1 | 4.89    | 15.0 | 61.0 | 13.04   | 17.0 | 71.0 | 16.86   | 17.8 | 66.0 | 21.70   | 23.7 | 44.4 | 41.83   | 23.9 | 45.0 | 82.71   | 16.2 | 67.0 | 15.35   | 8.9  | 83.5 | 2.42    |
| Świdnik    | 9.0         | 69.9 | 4.06    | 14.7 | 65.8 | 11.64   | 15.9 | 74.0 | 12.55   | 19.9 | 57.1 | 36.11   | 22.2 | 50.0 | 33.19   | 25.9 | 51.0 | 146.14  | 15.0 | 60.0 | 13.20   | 13.6 | 70.9 | 8.57    |
| Łęczna     | 12.0        | 74.0 | 5.93    | 16.0 | 80.0 | 10.60   | 18.4 | 62.0 | 25.66   | 21.0 | 61.9 | 45.70   | 24.4 | 55.6 | 71.37   | 24.0 | 43.2 | 82.41   | 13.9 | 60.0 | 10.82   | 12.4 | 72.7 | 6.59    |
| Krasnystaw | 10.0        | 77.8 | 3.73    | 11.9 | 66.8 | 6.90    | 15.5 | 67.0 | 13.31   | 19.4 | 62.2 | 31.84   | 25.0 | 60.5 | 97.17   | 25.1 | 55.0 | 123.18  | 15.7 | 61.5 | 14.83   | 11.5 | 73.7 | 5.50    |
|            | Subregion C |      |         |      |      |         |      |      |         |      |      |         |      |      |         |      |      |         |      |      |         |      |      |         |
| Parczew    | 11.0        | 74.3 | 4.95    | 17.0 | 70.0 | 17.19   | 15.9 | 77.3 | 11.39   | 19.0 | 57.8 | 29.84   | 23.0 | 53.9 | 46.12   | 25.9 | 61.0 | 155.0   | 16.2 | 51.0 | 17.22   | 11.1 | 80.5 | 4.04    |
| Włodawa    | 10.4        | 80.0 | 3.66    | 15.0 | 75.5 | 10.01   | 17.0 | 80.6 | 12.86   | 18.2 | 77.0 | 18.99   | 25.1 | 68.8 | 123.04  | 24.0 | 70.0 | 89.73   | 16.0 | 70.2 | 13.93   | 10.8 | 80.3 | 3.86    |
| Hrubieszów | 10.5        | 71.0 | 5.00    | 14.5 | 81.1 | 7.47    | 17.0 | 67.0 | 18.01   | 18.3 | 70.6 | 22.55   | 25.0 | 52.0 | 76.50   | 24.8 | 48.8 | 108.34  | 14.9 | 59.0 | 13.12   | 13.4 | 78.0 | 6.75    |
| Chełm      | 8.8         | 80.5 | 1.88    | 12.1 | 70.5 | 6.61    | 15.8 | 77.0 | 48.80   | 18.0 | 66.7 | 22.38   | 26.1 | 55.0 | 115.57  | 25.0 | 51.2 | 116.55  | 12.6 | 55.1 | 9.05    | 9.8  | 71.0 | 4.46    |
|            | Subregion D |      |         |      |      |         |      |      |         |      |      |         |      |      |         |      |      |         |      |      |         |      |      |         |
| Janów      | 11.1        | 70.0 | 5.63    | 15.0 | 71.9 | 10.99   | 16.1 | 65.0 | 15.42   | 19.5 | 59.3 | 32.92   | 24.6 | 48.7 | 62.14   | 24.8 | 47.0 | 105.58  | 13.8 | 60.5 | 10.56   | 11.0 | 80.5 | 3.97    |
| Biłgoraj   | 12.1        | 77.6 | 5.39    | 14.3 | 70.6 | 9.84    | 16.0 | 73.0 | 13.13   | 18.5 | 66.6 | 25.05   | 23.8 | 45.7 | 45.15   | 26.1 | 40.6 | 129.14  | 14.5 | 55.5 | 12.48   | 11.3 | 77.0 | 4.78    |
| Zamość     | 10.0        | 82.0 | 3.13    | 15.8 | 80.0 | 10.22   | 17.8 | 80.1 | 15.67   | 18.2 | 71.9 | 21.41   | 26.6 | 70.5 | 203.44  | 24.1 | 60.0 | 96.95   | 15.5 | 77.3 | 10.48   | 11.9 | 82.9 | 4.17    |
| Tomaszów   | 9.0         | 73.9 | 3.63    | 14.3 | 70.9 | 9.80    | 14.9 | 72.8 | 10.57   | 18.7 | 69.2 | 25.09   | 22.7 | 62.4 | 51.73   | 23.9 | 60.5 | 92.70   | 14.7 | 60.0 | 12.48   | 14.0 | 69.8 | 9.48    |

**Supplementary Tab. 1.** Weather conditions during collection of *Ixodes ricinus* ticks (T – temperature, RH – relative humidity, StDf – saturation deficit)

| District    | Population | Number of cases |     |      |     |      |     |      |     | Average number of cases $\pm$ SD |                 | Average incidence per 100,000 $\pm$ SD |                 |
|-------------|------------|-----------------|-----|------|-----|------|-----|------|-----|----------------------------------|-----------------|----------------------------------------|-----------------|
|             |            | 2017            |     | 2018 |     | 2019 |     | 2020 |     | 2017-2020                        |                 | 2017-2020                              |                 |
|             |            | LB              | TBE | LB   | TBE | LB   | TBE | LB   | TBE | LB                               | TBE             | LB                                     | TBE             |
| Subregion A |            |                 |     |      |     |      |     |      |     |                                  |                 |                                        |                 |
| Puławy      | 112835     | 151             | 1   | 110  | 0   | 86   | 0   | 8    | 0   | 88.75 $\pm$ 52.09                | 0.25 $\pm$ 0.50 | 78.65 $\pm$ 53.30                      | 0.72 $\pm$ 0.51 |
| Opole       | 58952      | 100             | 1   | 65   | 0   | 65   | 0   | 28   | 0   | 64.50 $\pm$ 25.46                | 0.25 $\pm$ 0.50 | 109.41 $\pm$ 49.87                     | 0.42 $\pm$ 0.97 |
| Ryki        | 55841      | 42              | 0   | 23   | 0   | 21   | 0   | 2    | 0   | 22.00 $\pm$ 14.15                | 0.00 $\pm$ 0.00 | 39.40 $\pm$ 29.28                      | 0.00 $\pm$ 0.00 |
| Kraśnik     | 95064      | 146             | 0   | 209  | 0   | 173  | 3   | 56   | 0   | 146.00 $\pm$ 56.56               | 0.75 $\pm$ 1.50 | 153.58 $\pm$ 68.70                     | 0.79 $\pm$ 1.82 |
| Łuków       | 106591     | 53              | 2   | 46   | 1   | 38   | 2   | 7    | 0   | 36.00 $\pm$ 17.56                | 1.25 $\pm$ 0.95 | 33.77 $\pm$ 19.02                      | 1.17 $\pm$ 0.54 |
| Subregion B |            |                 |     |      |     |      |     |      |     |                                  |                 |                                        |                 |
| Radzyń      | 58604      | 68              | 3   | 58   | 2   | 79   | 3   | 43   | 3   | 62.00 $\pm$ 13.24                | 2.75 $\pm$ 0.50 | 105.79 $\pm$ 26.10                     | 4.69 $\pm$ 0.98 |
| Lublin      | 495477     | 62              | 0   | 149  | 1   | 150  | 1   | 24   | 1   | 96.25 $\pm$ 54.91                | 0.75 $\pm$ 0.50 | 19.43 $\pm$ 12.79                      | 0.15 $\pm$ 0.11 |
| Lubartów    | 88152      | 109             | 0   | 68   | 0   | 27   | 2   | 7    | 0   | 52.75 $\pm$ 39.21                | 0.50 $\pm$ 1.00 | 59.84 $\pm$ 51.37                      | 0.57 $\pm$ 1.31 |
| Świdnik     | 71739      | 28              | 0   | 54   | 0   | 92   | 0   | 45   | 0   | 54.75 $\pm$ 23.44                | 0.00 $\pm$ 0.00 | 76.32 $\pm$ 37.73                      | 0.00 $\pm$ 0.00 |
| Łęczna      | 57298      | 27              | 0   | 37   | 0   | 17   | 0   | 27   | 0   | 27.00 $\pm$ 7.07                 | 0.00 $\pm$ 0.00 | 47.12 $\pm$ 14.25                      | 0.00 $\pm$ 0.00 |
| Krasnystaw  | 62940      | 68              | 0   | 79   | 0   | 99   | 0   | 64   | 0   | 77.50 $\pm$ 13.57                | 0.00 $\pm$ 0.00 | 123.13 $\pm$ 24.90                     | 0.00 $\pm$ 0.00 |
| Subregion C |            |                 |     |      |     |      |     |      |     |                                  |                 |                                        |                 |
| Parczew     | 34590      | 45              | 0   | 42   | 1   | 40   | 0   | 23   | 0   | 37.50 $\pm$ 8.55                 | 0.25 $\pm$ 0.50 | 108.41 $\pm$ 28.57                     | 0.72 $\pm$ 1.66 |
| Włodawa     | 38207      | 99              | 1   | 127  | 2   | 98   | 2   | 37   | 1   | 90.25 $\pm$ 32.97                | 1.50 $\pm$ 0.57 | 236.21 $\pm$ 99.35                     | 3.93 $\pm$ 1.51 |
| Hrubieszów  | 62473      | 19              | 0   | 25   | 0   | 44   | 0   | 13   | 0   | 25.25 $\pm$ 11.62                | 0.00 $\pm$ 0.00 | 40.42 $\pm$ 21.49                      | 0.00 $\pm$ 0.00 |
| Chełm       | 139340     | 202             | 0   | 208  | 0   | 201  | 1   | 127  | 0   | 184.50 $\pm$ 33.30               | 0.25 $\pm$ 0.50 | 132.41 $\pm$ 27.60                     | 0.18 $\pm$ 0.41 |
| Biała       | 167648     | 244             | 0   | 246  | 0   | 229  | 1   | 22   | 1   | 185.25 $\pm$ 94.48               | 0.50 $\pm$ 0.57 | 110.50 $\pm$ 65.07                     | 0.30 $\pm$ 0.34 |
| Subregion D |            |                 |     |      |     |      |     |      |     |                                  |                 |                                        |                 |
| Janów       | 45503      | 70              | 0   | 68   | 0   | 74   | 1   | 50   | 0   | 65.50 $\pm$ 9.20                 | 0.25 $\pm$ 0.50 | 143.95 $\pm$ 23.36                     | 0.55 $\pm$ 1.26 |
| Biłgoraj    | 100617     | 141             | 0   | 27   | 0   | 48   | 0   | 16   | 0   | 58.00 $\pm$ 49.27                | 0.00 $\pm$ 0.00 | 57.64 $\pm$ 56.55                      | 0.00 $\pm$ 0.00 |
| Zamość      | 169072     | 205             | 0   | 213  | 0   | 135  | 0   | 98   | 0   | 162.75 $\pm$ 48.14               | 0.00 $\pm$ 0.00 | 96.26 $\pm$ 32.88                      | 0.00 $\pm$ 0.00 |
| Tomaszów    | 82337      | 96              | 1   | 97   | 3   | 127  | 0   | 87   | 0   | 101.75 $\pm$ 15.08               | 1.00 $\pm$ 1.21 | 123.58 $\pm$ 21.16                     | 1.21 $\pm$ 1.85 |

**Supplementary Tab. 2.** Number of cases and the average incidence of LB and TBE in districts of the Lublin Province in 2017-2020 (LB – Lyme borreliosis, TBE – tick borne encephalitis, SD – standard deviation)

| Gatunek                    | Hunting Zone (Districts of Lublin Prvince) |                               |                                                                              |                                      |                                                        |                                    |
|----------------------------|--------------------------------------------|-------------------------------|------------------------------------------------------------------------------|--------------------------------------|--------------------------------------------------------|------------------------------------|
|                            | <b>Biała</b> (Parczew, Biała)              | <b>Chelm</b> (Chelm, Włodawa) | <b>Lublin</b> (Lublin, Lubartów, Łęczna, Opole, Świdnik, Krasnystaw, Puławy) | <b>Siedlce</b> (Radzyń, Ryki, Łuków) | <b>Zamość</b> (Zamość, Tomaszów, Hrubieszów, Biłgoraj) | <b>Tarnobrzeg</b> (Janów, Kraśnik) |
| <i>Alces alces</i>         | 1271                                       | 1211                          | 1228                                                                         | 1309                                 | 705                                                    | 361                                |
| <i>Cervus elaphus</i>      | 2751                                       | 2327                          | 1606                                                                         | 1658                                 | 1941                                                   | 2479                               |
| <i>Capreolus capreolus</i> | 12187                                      | 10946                         | 15457                                                                        | 18853                                | 16708                                                  | 10361                              |

**Supplementary Tab. 3.** Estimated number of selected even-toed ungulates (Artiodactyla) in hunting zones, based on [www.czempin.pzlow.pl](http://www.czempin.pzlow.pl)
